# Supplementary material
Source: PubMed Central journal article supplement (PMC5097672)
Supplement: NIHMS825408-supplement-supplement_1.pdf [file NIHMS825408-supplement-supplement_1.pdf]

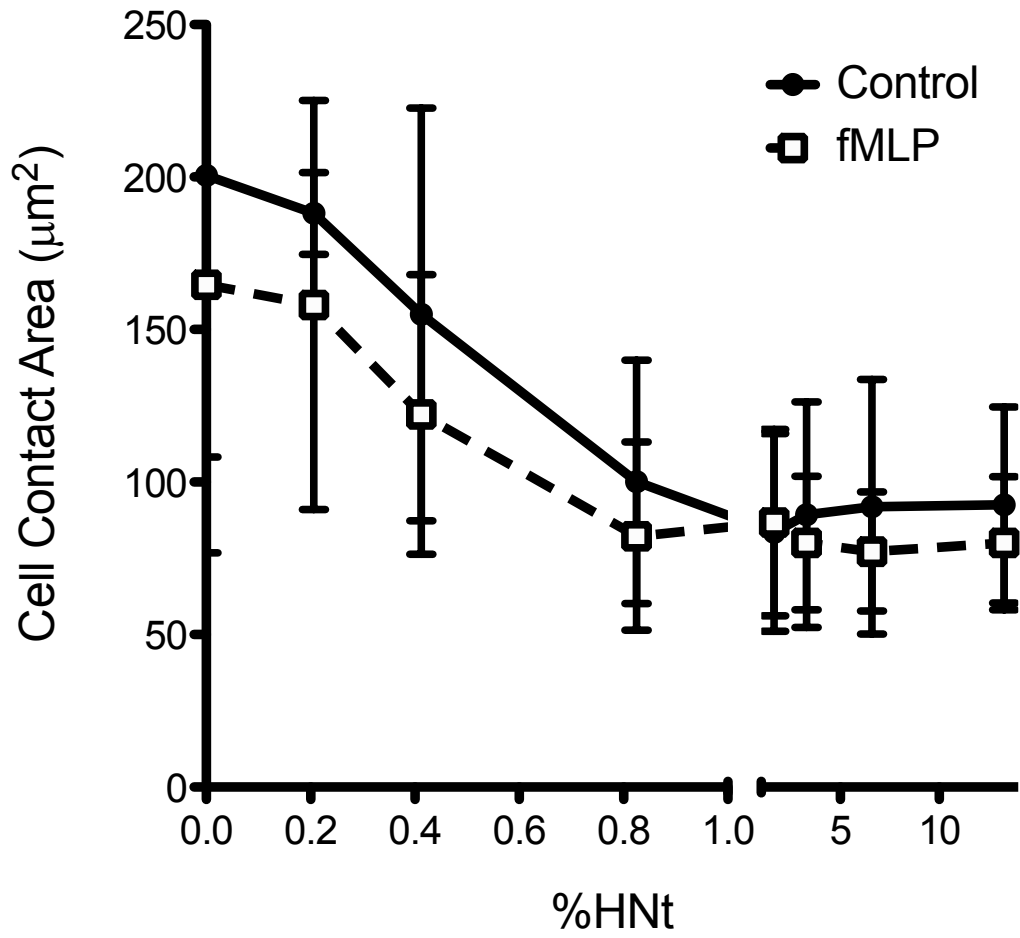

Supplemental Figure 1. 1 nM formyl-methionyl-leucyl-phenylalanine (fMLP) was introduced to leukocytes 15 min prior to allowing cells to adhere to HNT-coated surfaces. Error bars represent standard deviation.
